# Supplementary material for: Development of a novel starch-based dietary fiber using glucanotransferase
Source: Royal Society of Chemistry journal article supplement (doi:10.1039/d1fo00287b), 2021-01-01
Supplement: d1fo00287b1.pdf [file d1fo00287b1.pdf]

**Figure S1** HPSEC profiles of (A) MS and GMS, (B) WMS and GWMS, (C) HMS and GHMS.

A

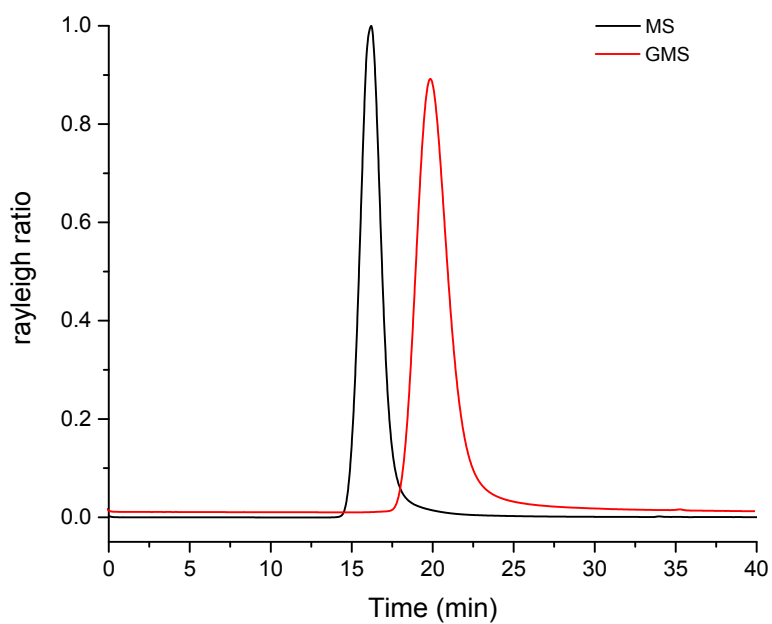

B

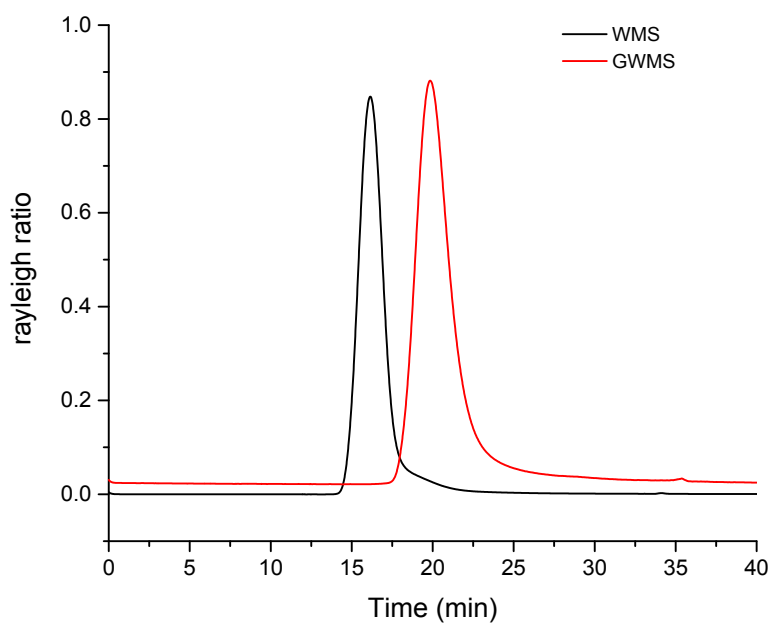

C

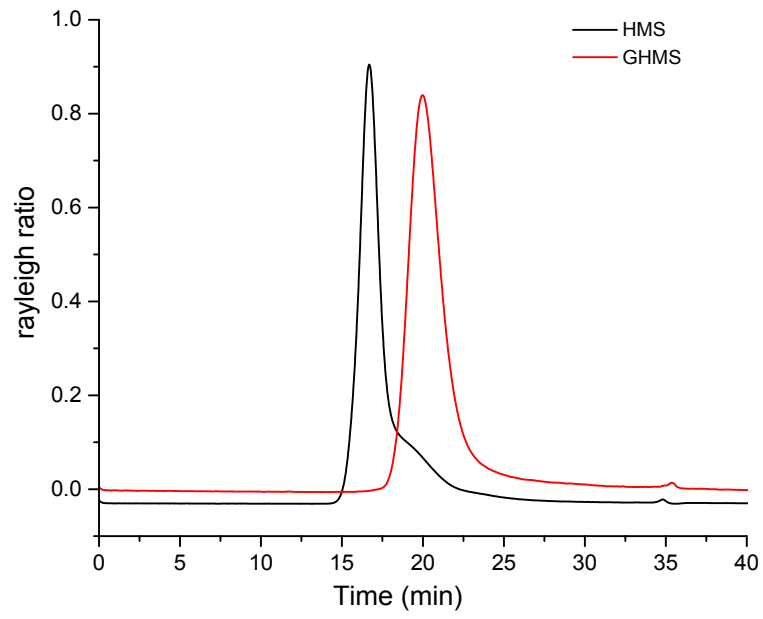

**Figure S2**  $^1\text{H}$  NMR spectra of native and GTase-treated starches.

WMS

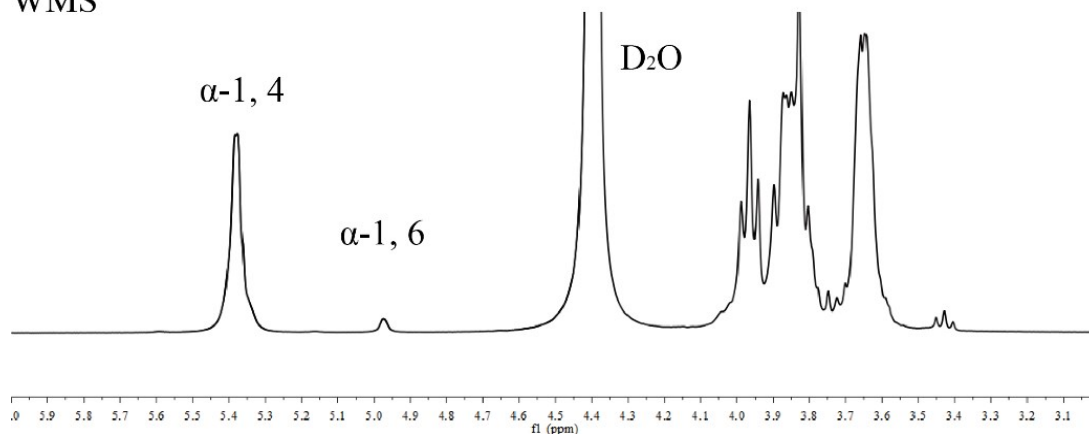

GWMS

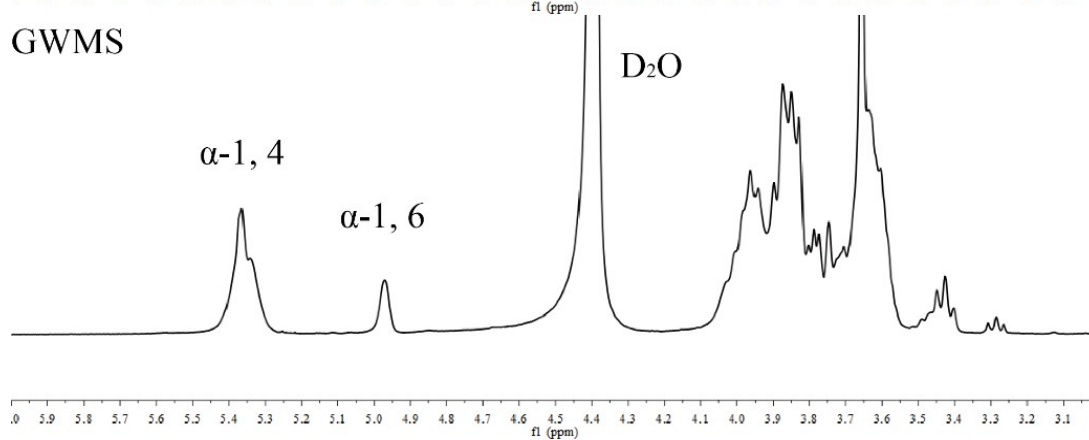

**Figure S3.** Schematic of structure for *A. chroococcum* NCIMB 8003 GTase-treated starches (A), *L. reuteri* 121 4,6- $\alpha$ -GTase-treated starches (B) and glycosidic chain-converting mechanism by *A. chroococcum* NCIMB 8003 GTase (C).

A

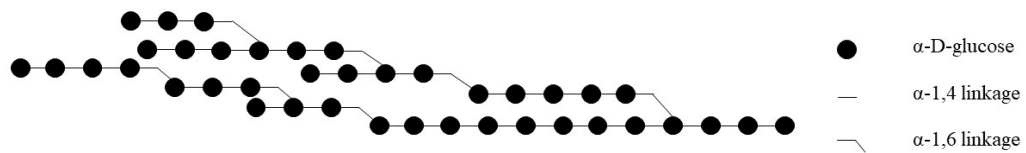

B

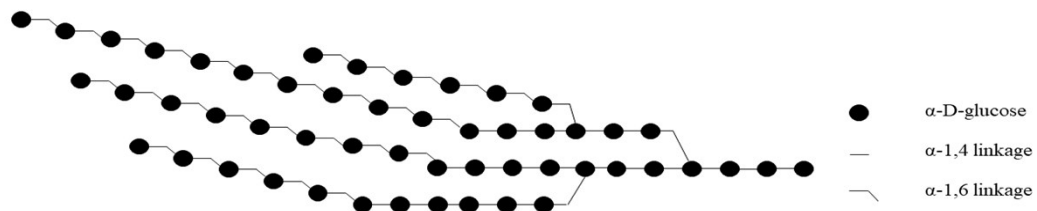

C

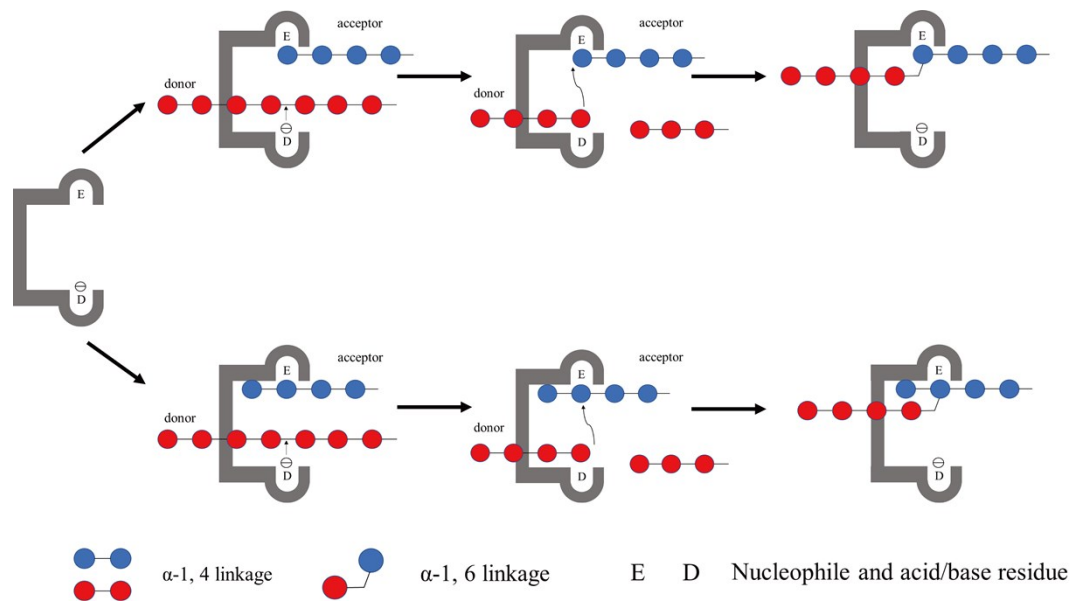

\* D is the nucleophile, E is the acid/base residue.
